# Supplementary material for: Effect of liquid confinement on regioselectivity in the hydrosilylation of alkynes with cationic Rh(i) N-heterocyclic carbene catalysts
Source: Royal Society of Chemistry journal article supplement (doi:10.1039/d2fd00152g), 2022-12-22
Supplement: d2fd00152g1.pdf [file d2fd00152g1.pdf]

## Supporting Information

### Effect of Liquid Confinement on Regioselectivity in the Hydrosilylation of Alkynes With Cationic Rh (I) *N*-Heterocyclic Carbene Catalysts

Pradeep K. R. Panyam, Michael R. Buchmeiser\*

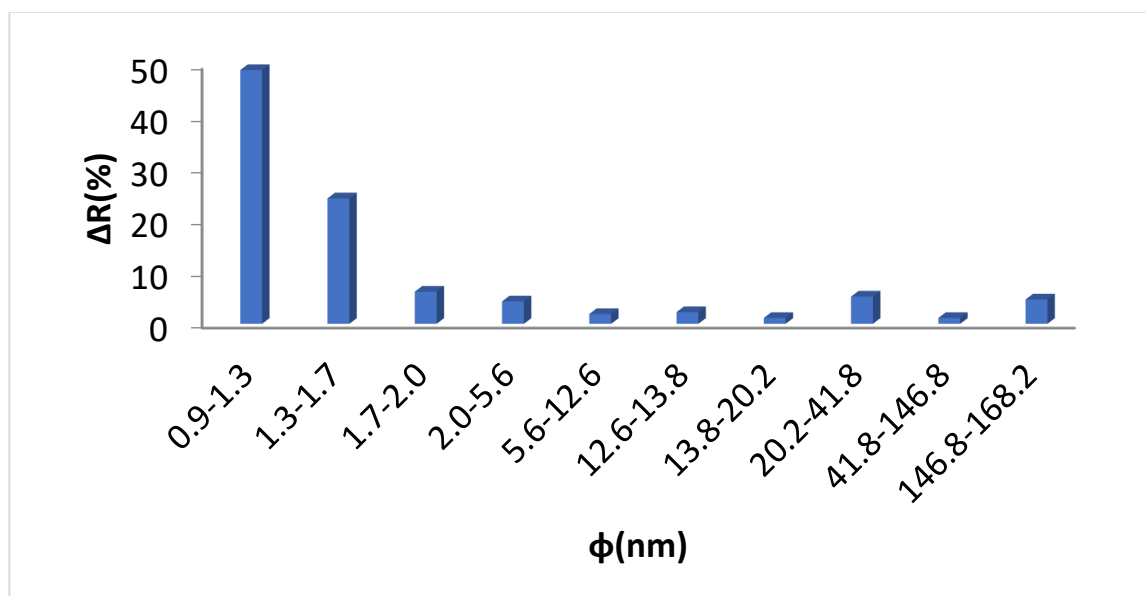

**Figure S1.** Representative pore size distribution of a ROMP-derived monolith. Relative abundance  $\Delta R$  (%) of pores with different diameters  $\Phi$  (nm).

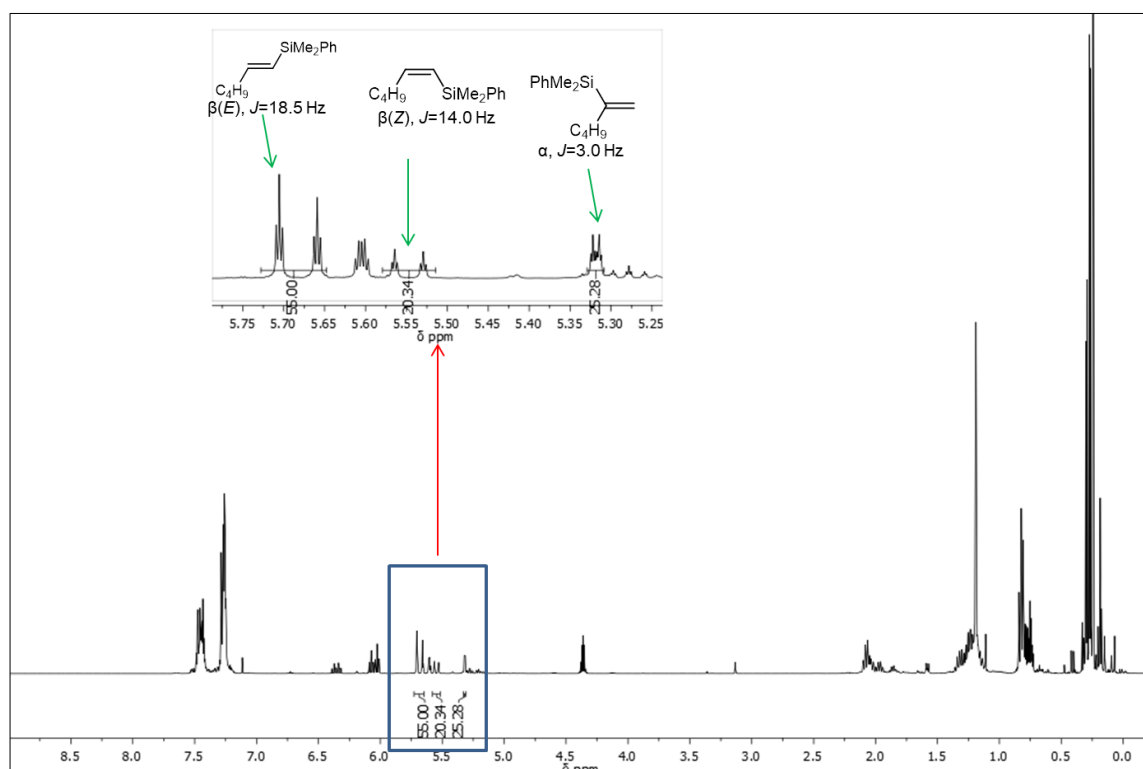

**Figure S2.**  $^1\text{H}$  NMR spectrum ( $\text{CDCl}_3$ , 298K) of the hydrosilylation of 1-hexyne with  $\text{HSiMe}_2\text{Ph}$  catalyzed by **Rh@biphasic**.

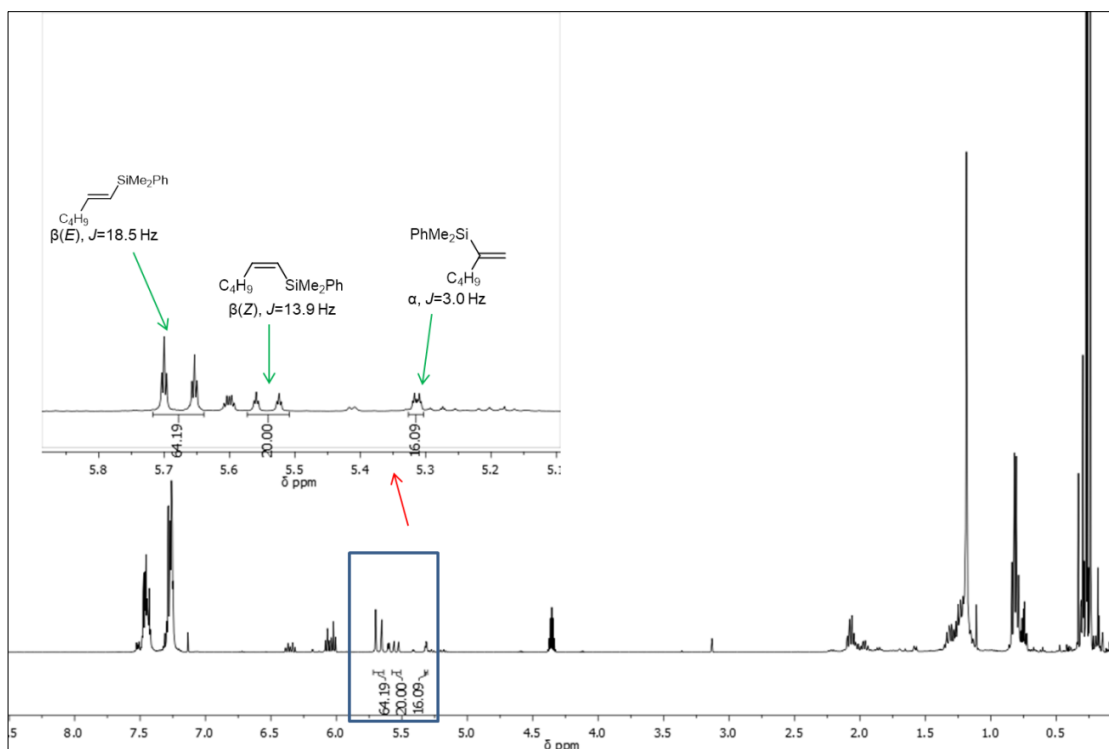

**Figure S3.**  $^1\text{H}$  NMR spectrum (CDCl<sub>3</sub>, 298K) of the hydrosilylation of 1-hexyne with HSiMe<sub>2</sub>Ph catalyzed by Rh@SILPR<sub>OMP-0</sub>.

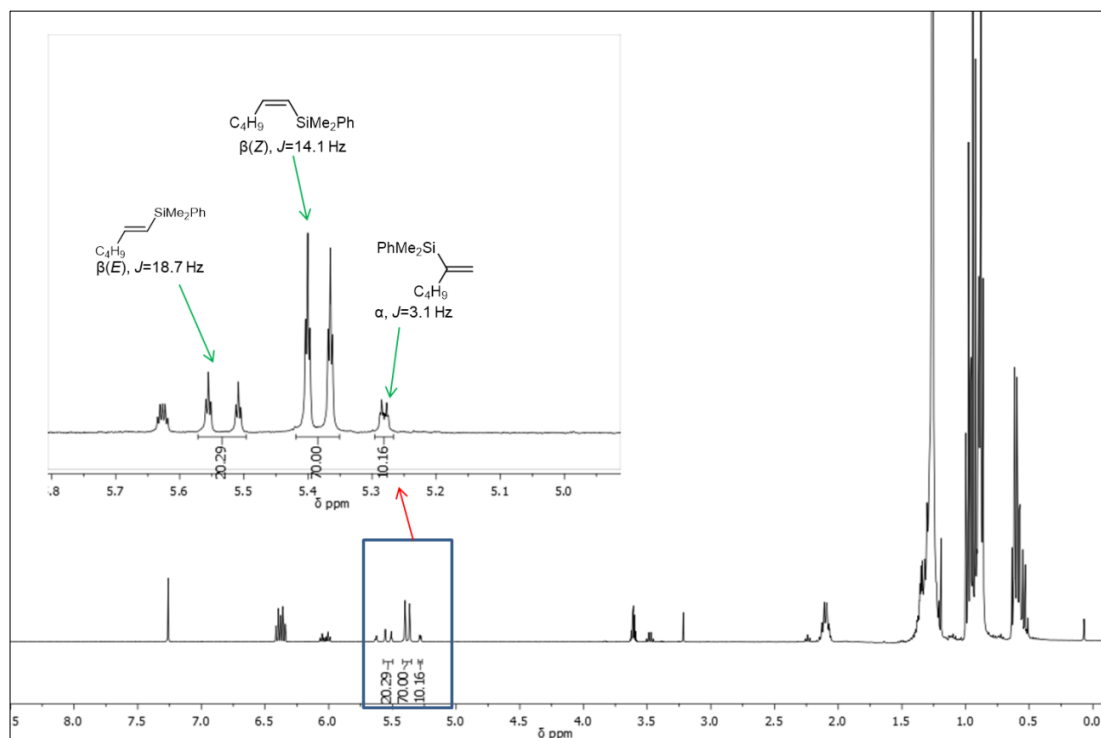

**Figure S4.**  $^1\text{H}$  NMR spectrum (CDCl<sub>3</sub>, 298K) of the hydrosilylation of 1-hexyne with HSiMe<sub>2</sub>Ph catalyzed by Rh@SILP<sub>OMP-10</sub>.

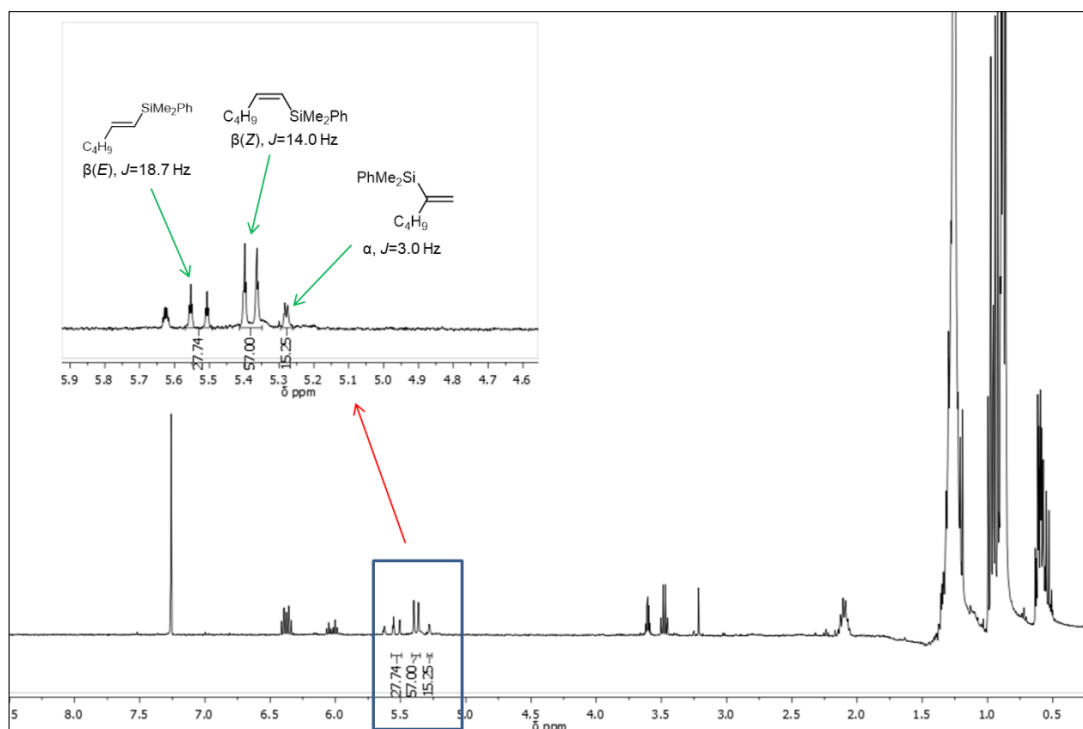

**Figure S5.**  $^1\text{H}$  NMR spectrum (CDCl<sub>3</sub>, 298K) of the hydrosilylation of 1-hexyne with HSiMe<sub>2</sub>Ph catalyzed by Rh@SILPROMP-25.

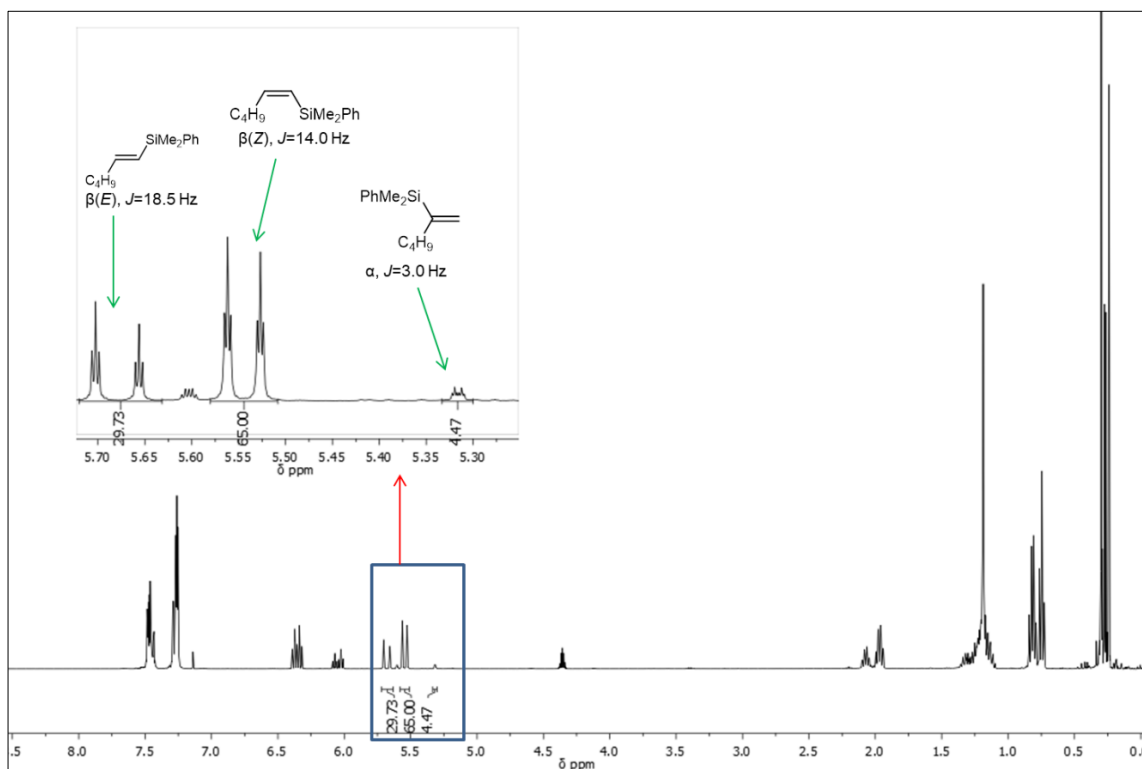

**Figure S6.**  $^1\text{H}$  NMR spectrum (CDCl<sub>3</sub>, 298K) of the hydrosilylation of 1-hexyne with HSiMe<sub>2</sub>Ph catalyzed by Rh@SILPROMP-50.

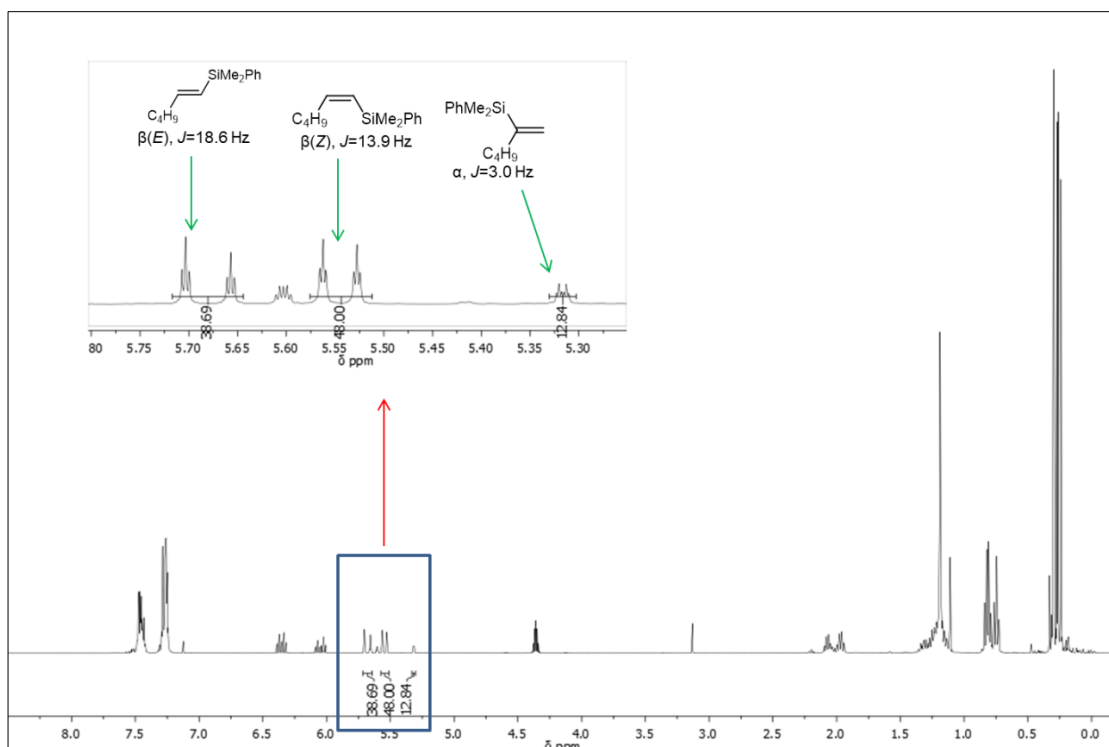

**Figure S7.**  $^1H$  NMR spectrum ( $CDCl_3$ , 298K) of the hydrosilylation of 1-hexyne with  $HSiMe_2Ph$  catalyzed by  $Rh@SILP_{ROMP-100}$ .

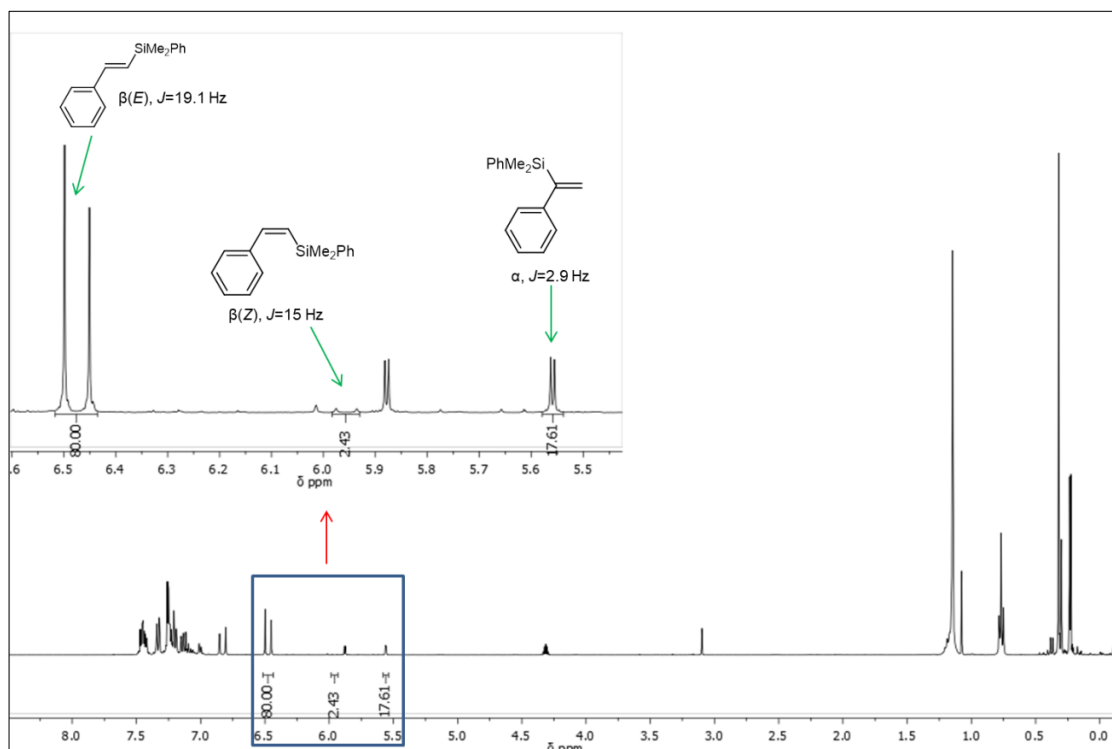

**Figure S8.**  $^1H$  NMR spectrum ( $CDCl_3$ , 298K) of the hydrosilylation of phenylacetylene with  $HSiMe_2Ph$  catalyzed by  $Rh@biphasic$ .

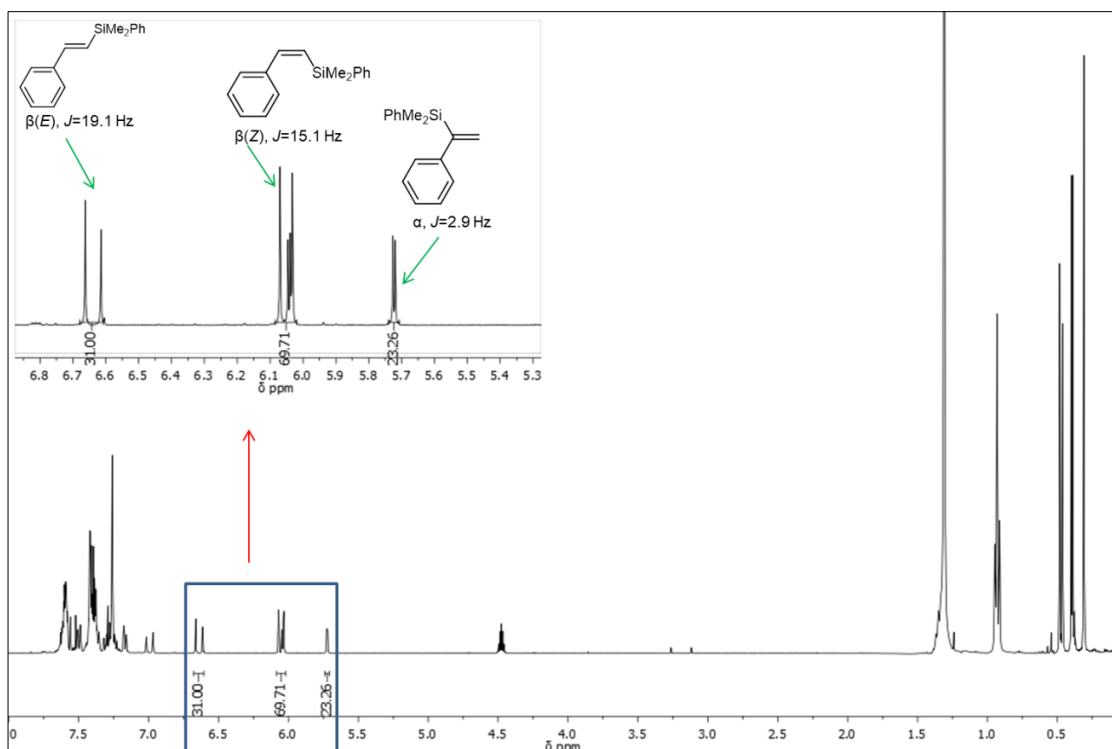

**Figure S9.**  $^1\text{H}$  NMR spectrum (CDCl<sub>3</sub>, 298K) of the hydrosilylation of phenylacetylene with HSiMe<sub>2</sub>Ph catalyzed by Rh@SILP<sub>ROMP-100</sub> (exemplary spectrum).

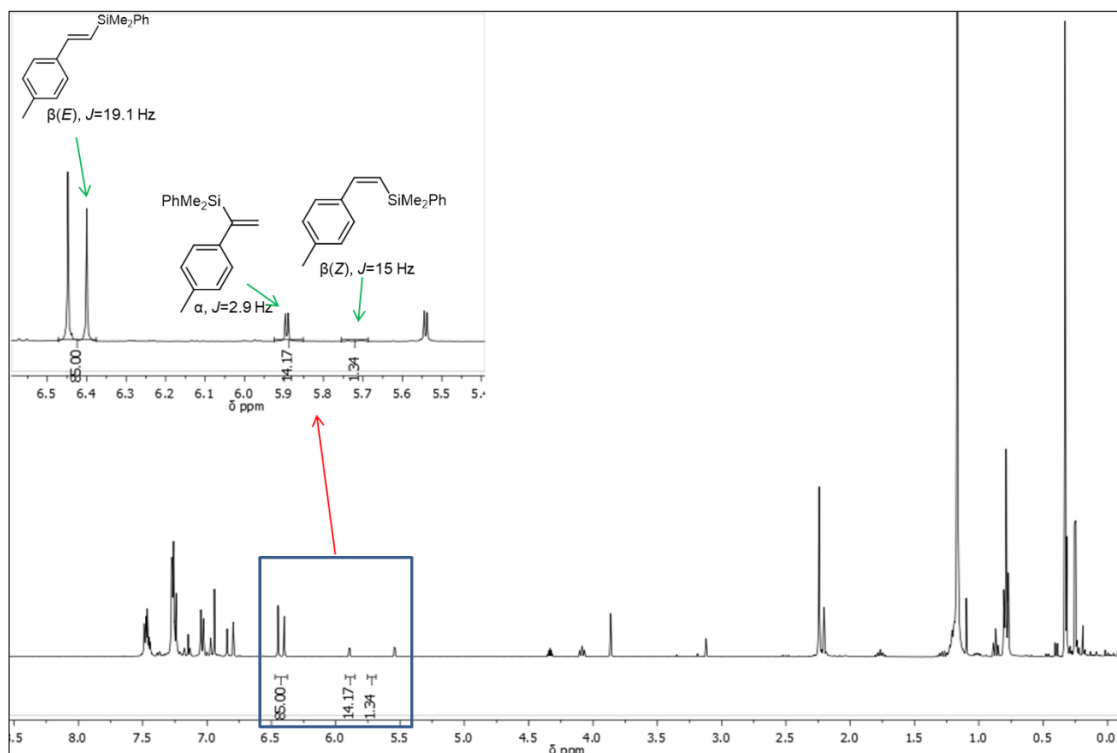

**Figure S10.**  $^1\text{H}$  NMR spectrum (CDCl<sub>3</sub>, 298K) of the hydrosilylation of 4-ethynyltoluene with HSiMe<sub>2</sub>Ph catalyzed by Rh@biphasic.

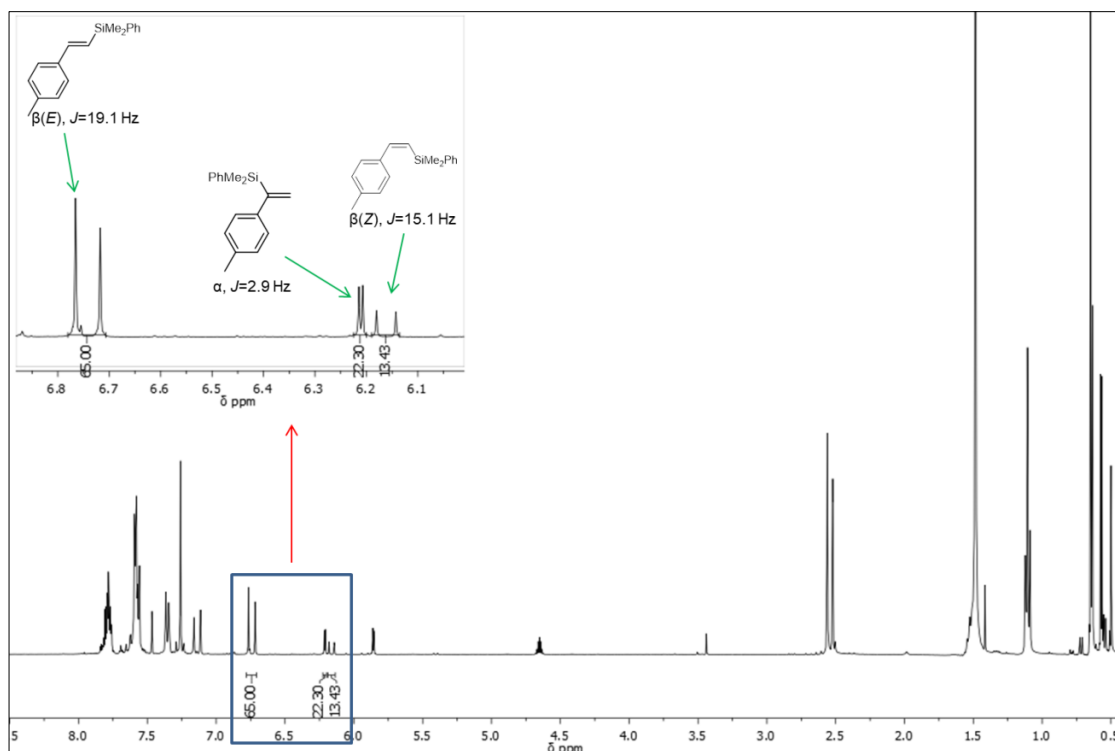

**Figure S11.**  $^1\text{H}$  NMR (CDCl<sub>3</sub>, 298K) of the hydrosilylation of 4-ethynyltoluene with HSiMe<sub>2</sub>Ph catalyzed by Rh@SILP-ROMP-100 (exemplary spectrum).

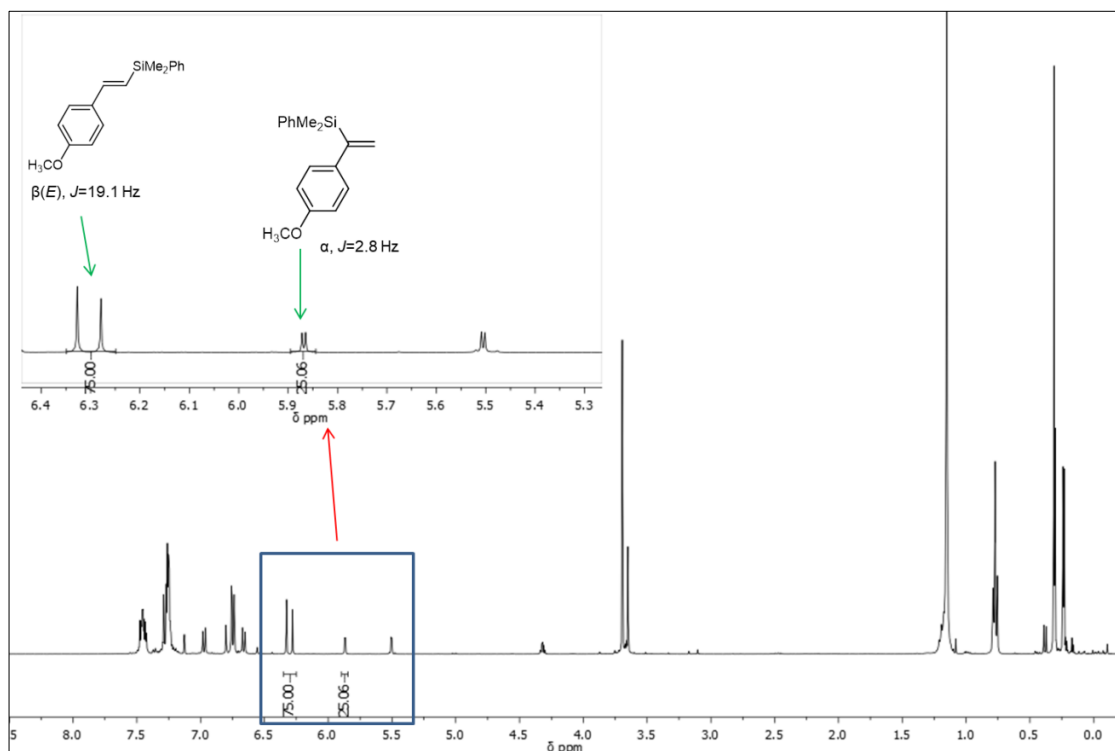

**Figure S12.**  $^1\text{H}$  NMR spectrum (CDCl<sub>3</sub>, 298K) of the hydrosilylation of 4-ethynylanisole with HSiMe<sub>2</sub>Ph catalyzed by Rh@biphasic.

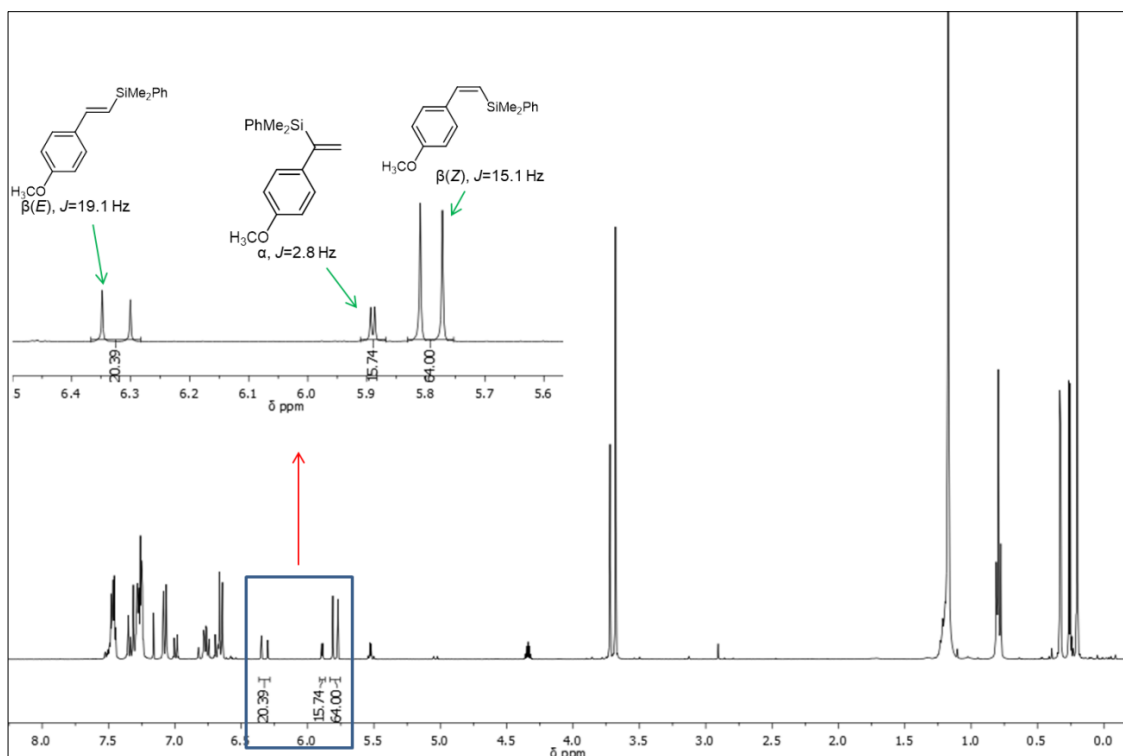

**Figure S13.**  $^1\text{H}$  NMR spectrum ( $\text{CDCl}_3$ , 298K) of the hydrosilylation of 4-ethynylanisole with  $\text{HSiMe}_2\text{Ph}$  catalyzed by **Rh@SILP<sub>ROMP-100</sub>** (exemplary spectrum).

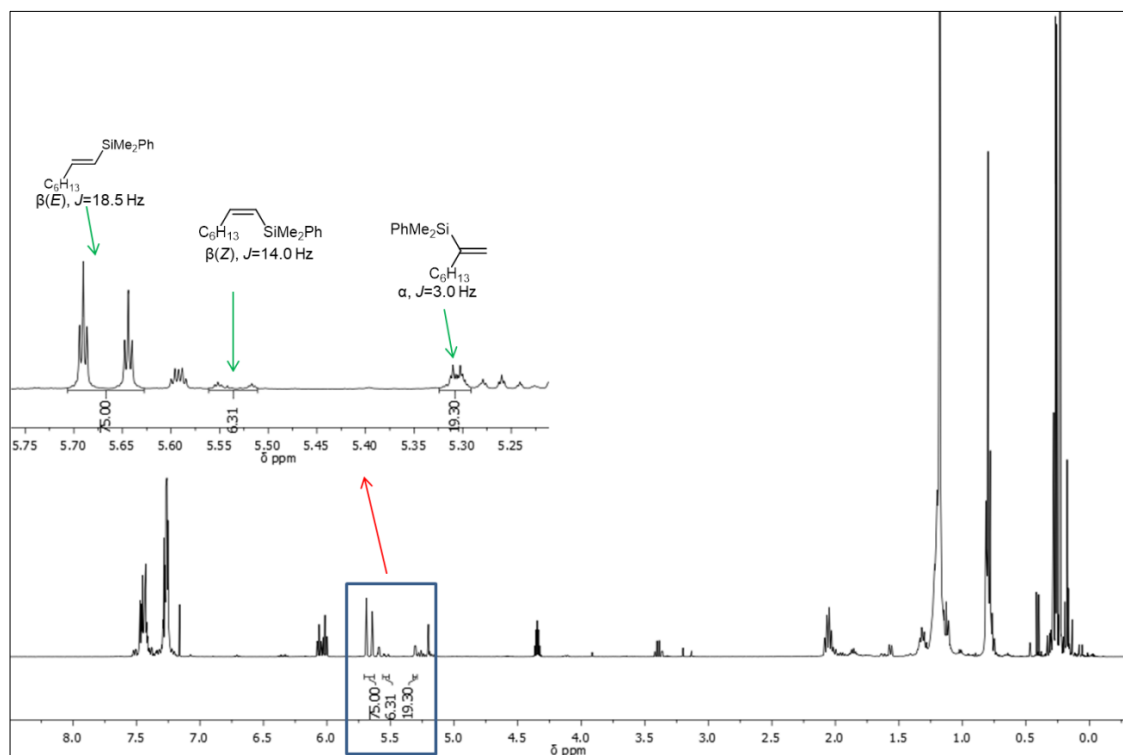

**Figure S14.**  $^1\text{H}$  NMR spectrum ( $\text{CDCl}_3$ , 298K) of the hydrosilylation of 1-octyne with  $\text{HSiMe}_2\text{Ph}$  catalyzed by **Rh@biphasic**.

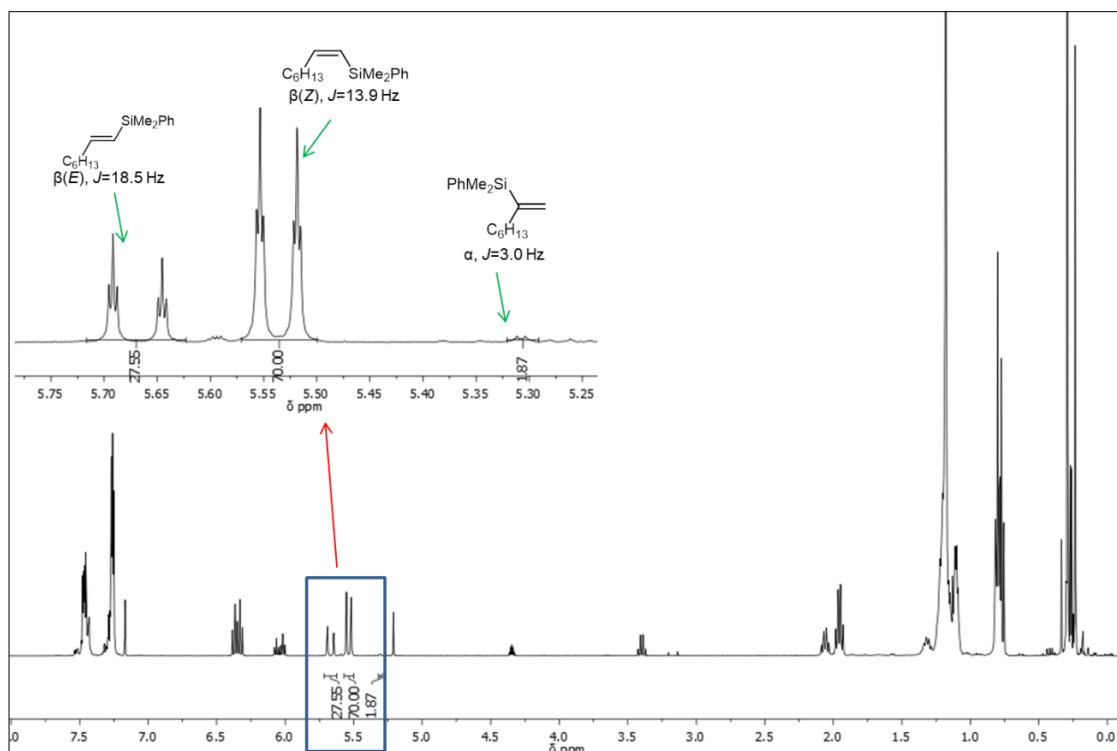

**Figure S15.**  $^1\text{H}$  NMR spectrum (CDCl<sub>3</sub>, 298K) of the hydrosilylation of 1-octyne with HSiMe<sub>2</sub>Ph catalyzed by Rh@SILP<sub>ROMP</sub>-100 (exemplary spectrum).

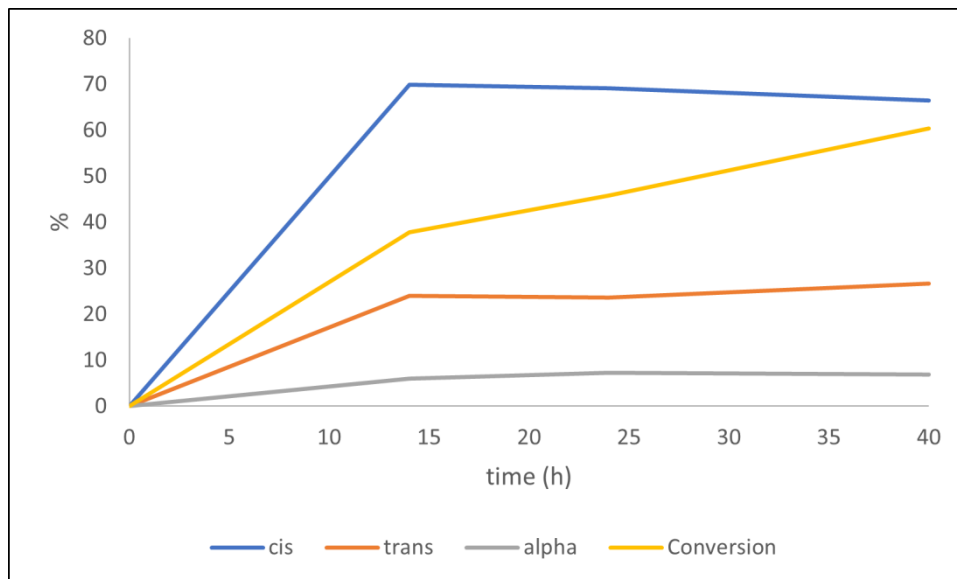

**Figure S16.** Hydrosilylation of 1-hexyne under continuous flow (0.2 mL/min, Rh@SILP<sub>ROMP</sub>-10).



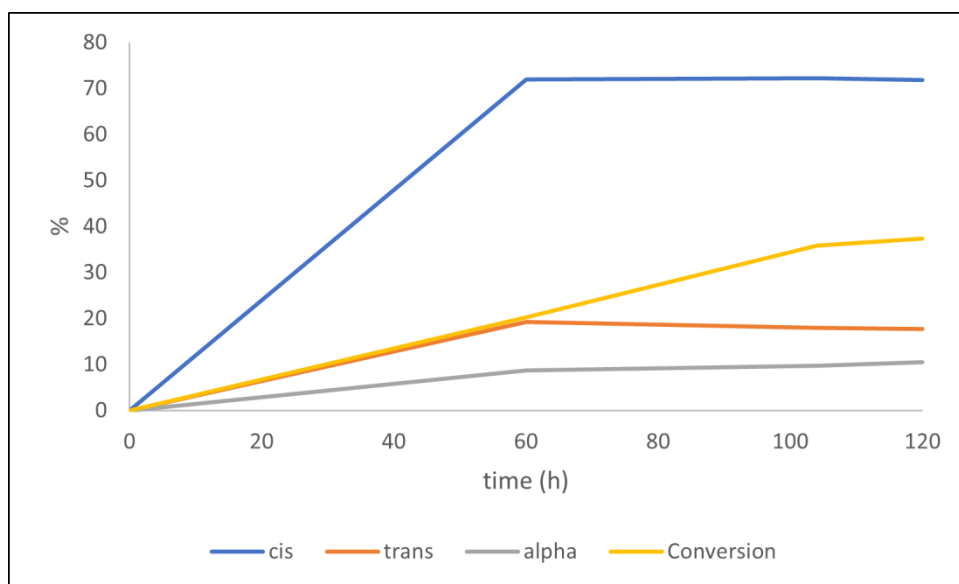

**Figure S17.** Hydrosilylation of 4-ethynylanisole under continuous flow (0.2 mL/min, **Rh@SILP<sub>ROMP-10</sub>**).

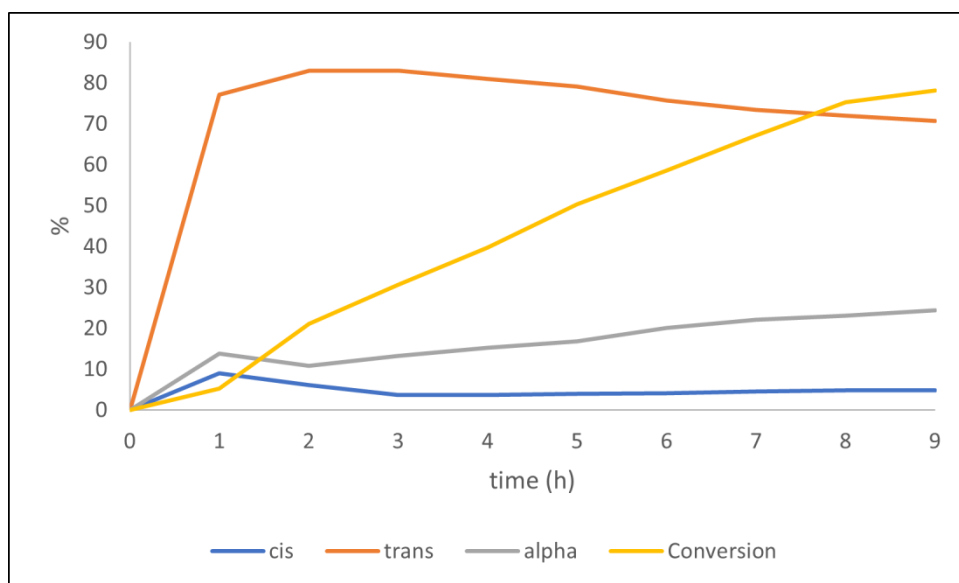

**Figure S18.** Hydrosilylation of 4-ethynylanisole under biphasic conditions.

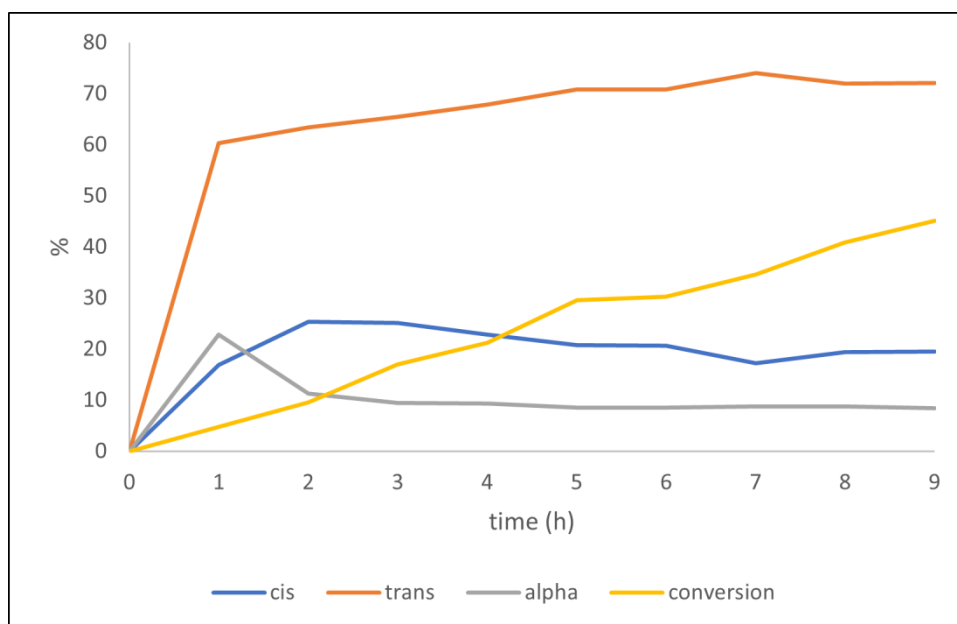

**Figure S19.** Hydrosilylation of 1-hexyne under biphasic conditions.

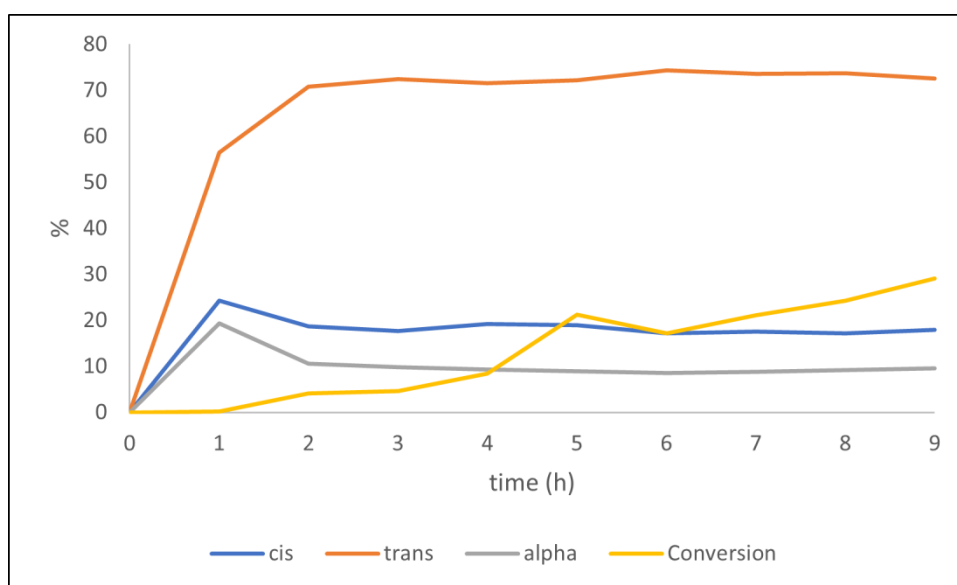

**Figure S20.** Hydrosilylation of 1-octyne under biphasic conditions.

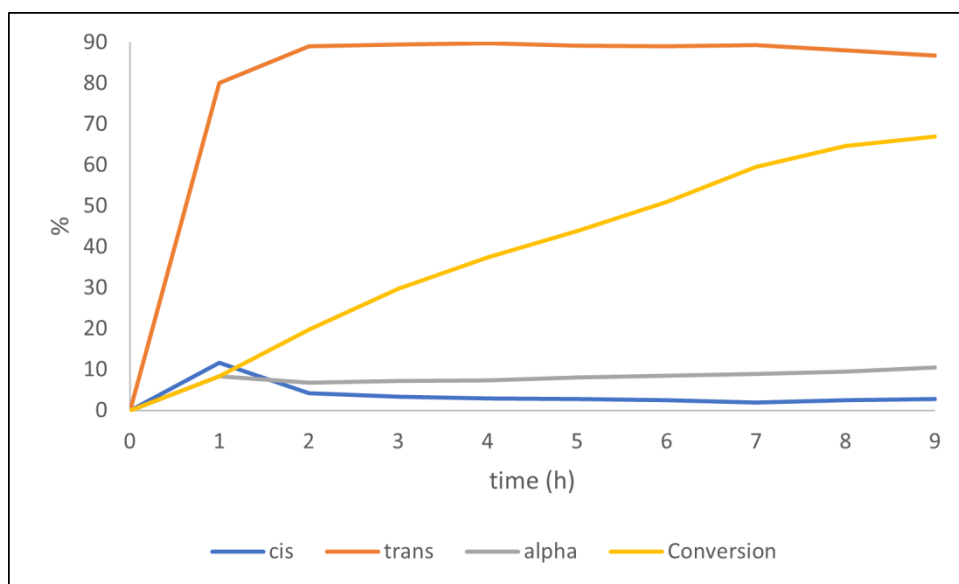

**Figure S21.** Hydrosilylation of 4-ethynyltoluene under biphasic conditions.

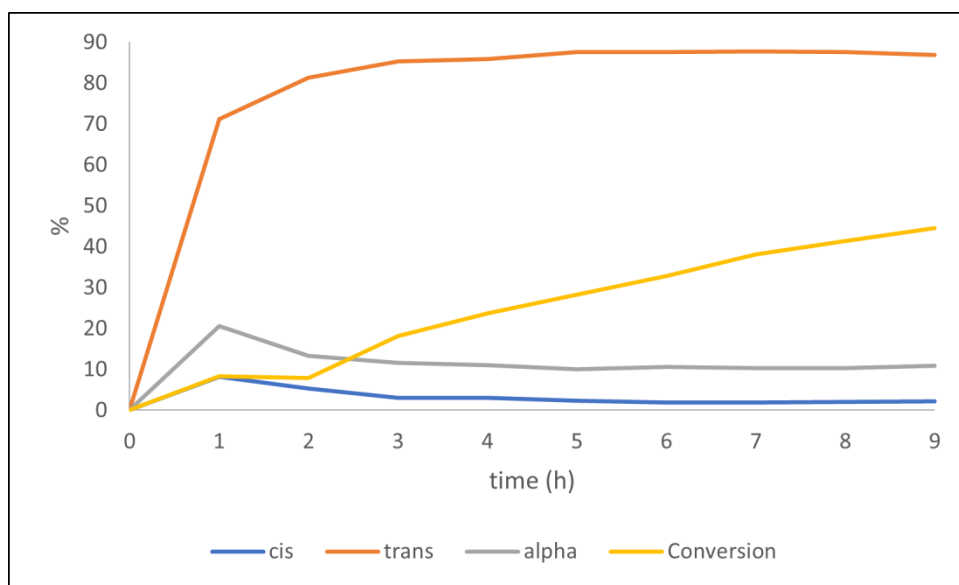

**Figure S22.** Hydrosilylation of phenylacetylene with HSiMe<sub>2</sub>Ph under biphasic conditions.
